# Supplementary material for: A biopolymer-based functional separator for stable Li metal batteries with an additive-free commercial electrolyte
Source: Royal Society of Chemistry journal article supplement (doi:10.1039/d0ta12153c), 2021-01-01
Supplement: d0ta12153c1.pdf [file d0ta12153c1.pdf]

Supporting information

**Biopolymer-based Functional Separator for Stable Li Metal Battery with  
Additive-Free Commercial Electrolyte**

Jooyoung Jeong,<sup>a,b</sup> Jia Lee,<sup>b</sup> Jinuk Kim,<sup>a</sup> Jinyoung Chun,<sup>c</sup> DongGyu Kang,<sup>d</sup> Seung Min Han,<sup>d</sup>  
Changshin Jo\*<sup>e</sup> and Jinwoo Lee\*<sup>a</sup>

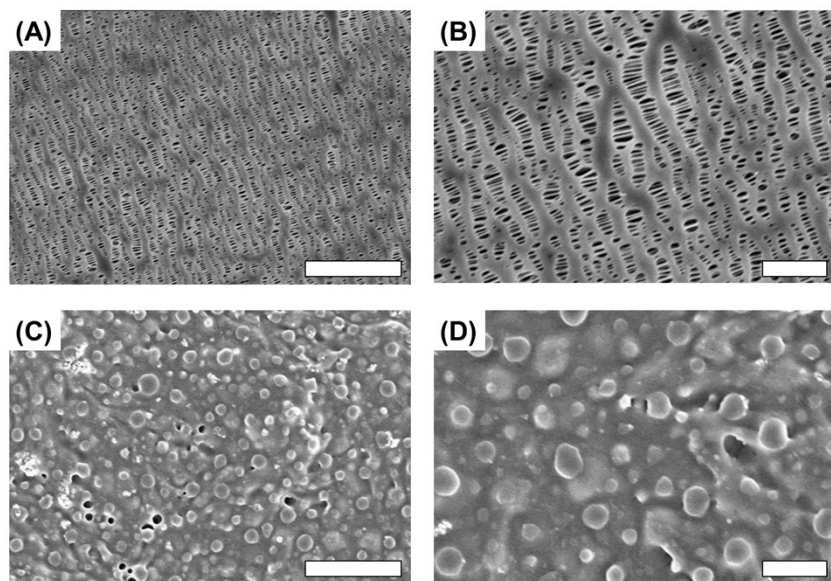

**Fig. S1** SEM images of (A), (B) PP separator and (C), (D) APP film (A), (C) at low magnitude (scale bar = 3 μm) and (B), (D) at high magnitude (scale bar = 1 μm)

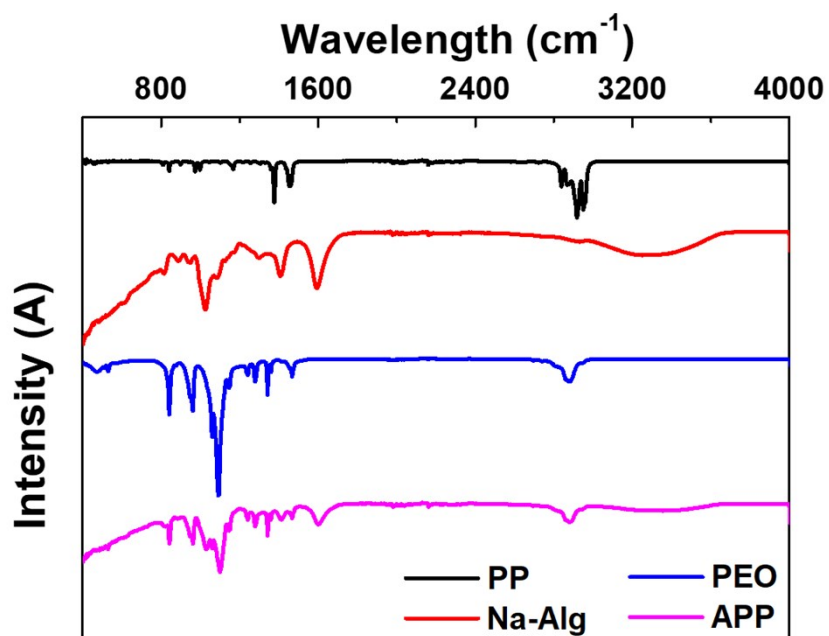

**Fig. S2** Fourier-transformed infra red spectra of PP (black), APP (Magenta), Na-Alg (Red), and PEO (Blue).

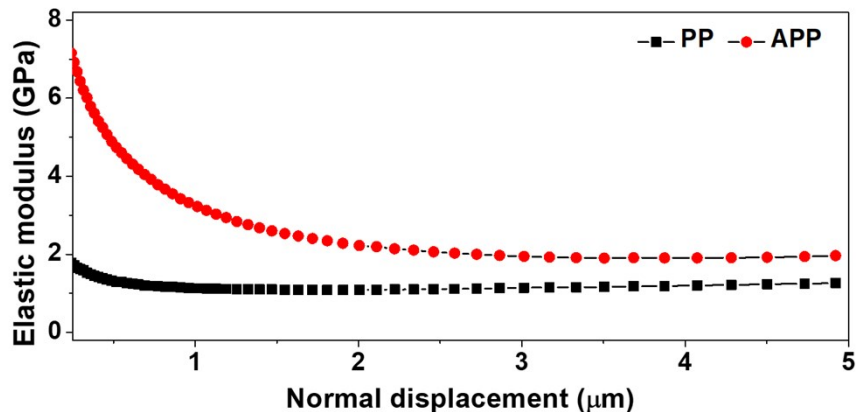

**Fig. S3** Nano-indentation analysis result of PP separator (black) and APP film (red)

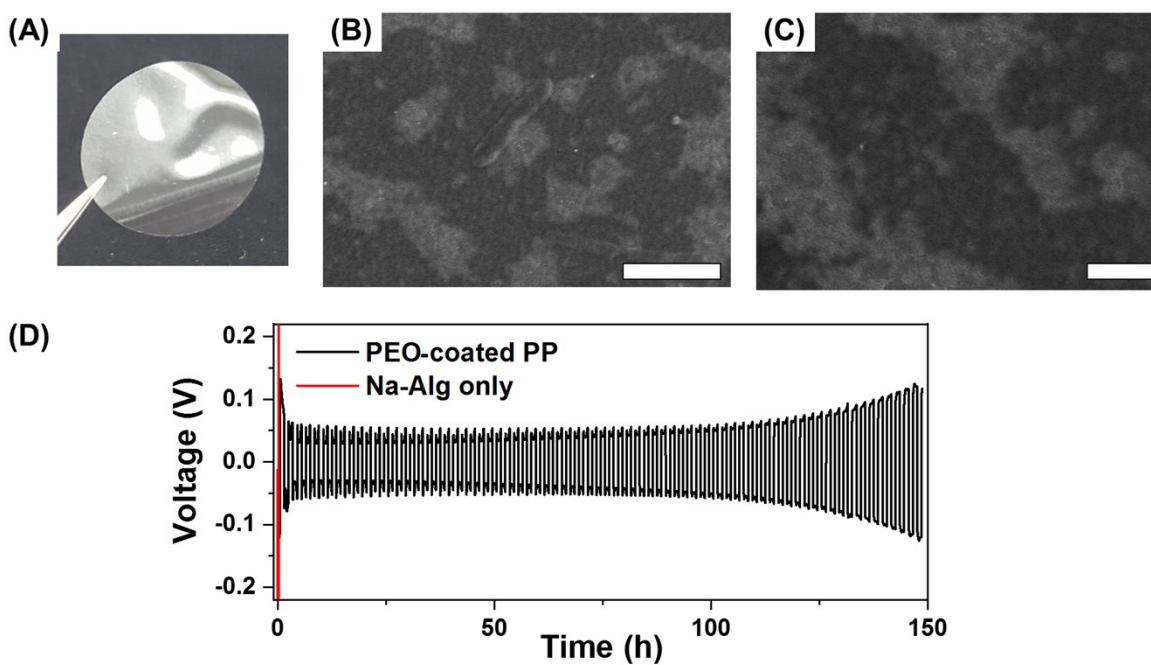

**Fig. S4** Polymer film composed of only Na-Alg. (A) In photograph and SEM images at (B) low magnification (scale bar = 3  $\mu\text{m}$ ) and (C) high magnification (scale bar = 1  $\mu\text{m}$ ) and (D) voltage profile of symmetric cell test with PEO-coated PP separator and Na-Alg only film in 1 M  $\text{LiPF}_6$  in EC:DMC=1:1 electrolyte at rate = 1  $\text{mA cm}^{-2}$  and capacity cut = 1  $\text{mA h cm}^{-2}$ .

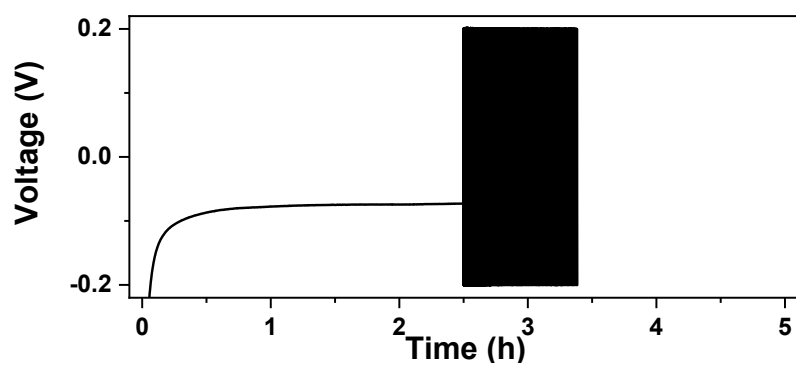

**Fig. S5** Cycle life of symmetric cell using PP separator and 1 M LiPF<sub>6</sub> in EC:DMC=1:1 electrolyte at rate = 5 mA cm<sup>-2</sup> and capacity cut = 5 mA h cm<sup>-2</sup>.

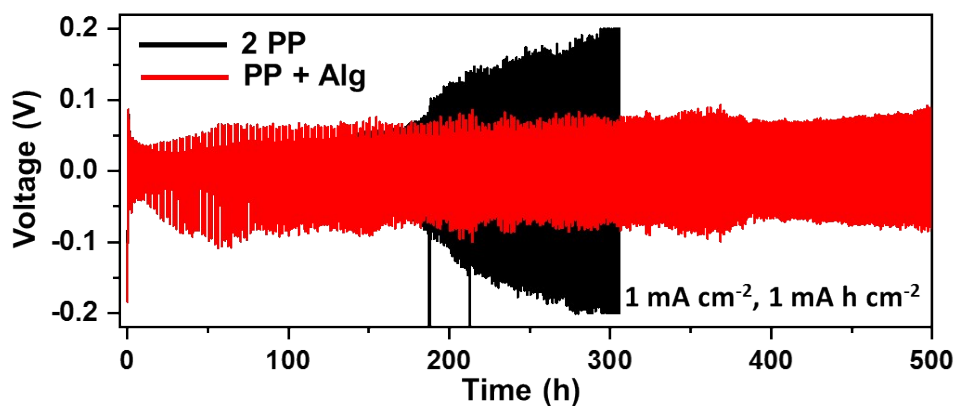

**Fig. S6** Voltage profile of symmetric cell test with two PP separator and PP + APP film in 1 M LiPF<sub>6</sub> in EC:DMC=1:1 electrolyte at rate = 1 mA cm<sup>-2</sup> and capacity cut = 1 mA h cm<sup>-2</sup>.

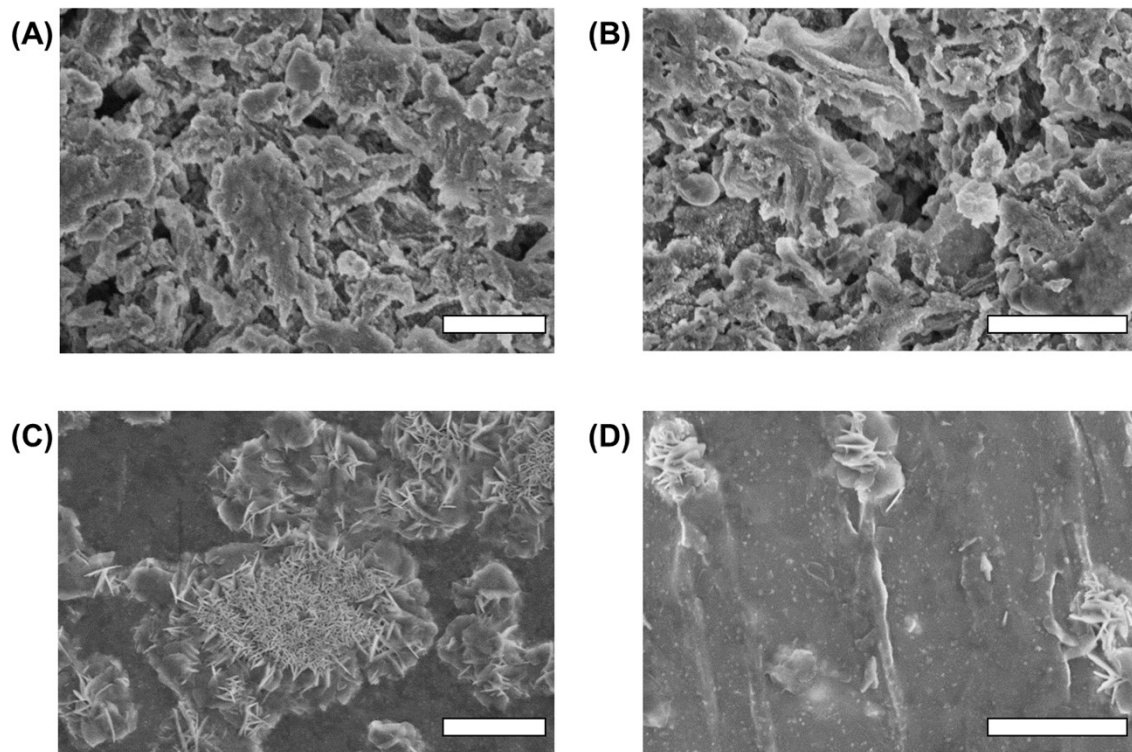

**Fig. S7** SEM images of (A), (B) PP-Li and (C), (D) at different part of Li metal. (all scale bars = 2 μm)

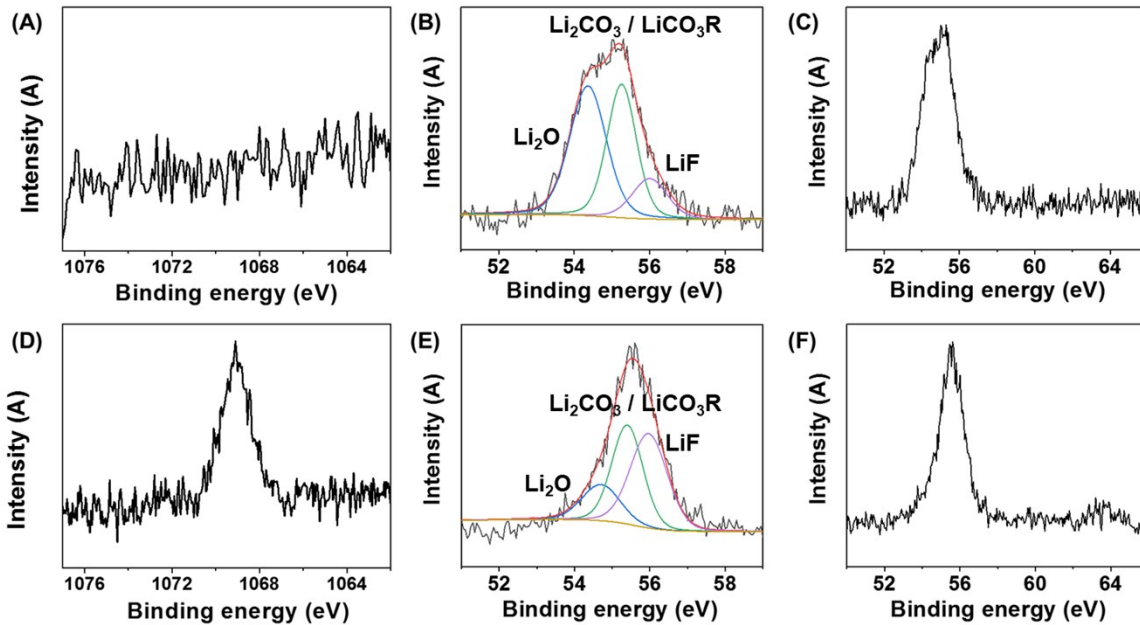

**Fig. S8** XPS spectra of (A)-(C) PP-Li and (D)-(F) APP-Li. (A),(D) Na 1s, (B),(E) Li 1s, and (C),(F) Li 1s with Na 2s binding energy range.

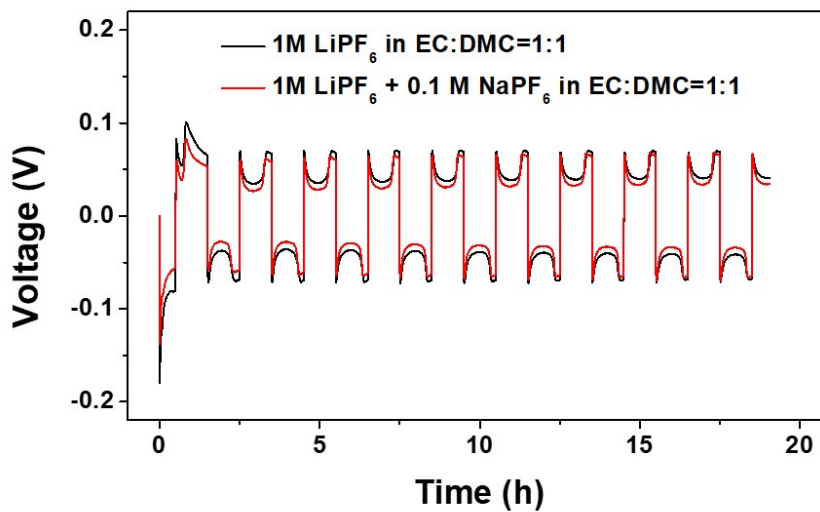

**Fig. S9** Voltage profile symmetric cell with and without  $\text{NaPF}_6$  in electrolyte with PP as separator.

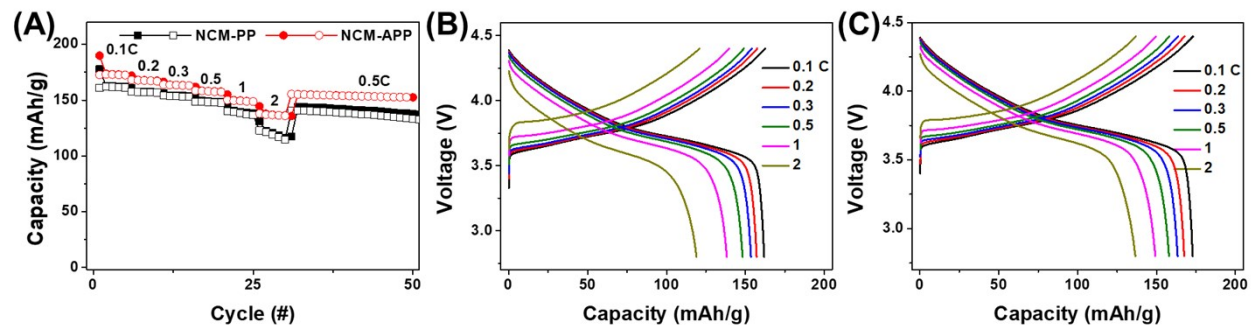

**Fig. S10** (A) Rate performance of NCM622 full-cell with PP or APP as separator and its voltage profile of (B) PP full-cell and (C) APP full-cell

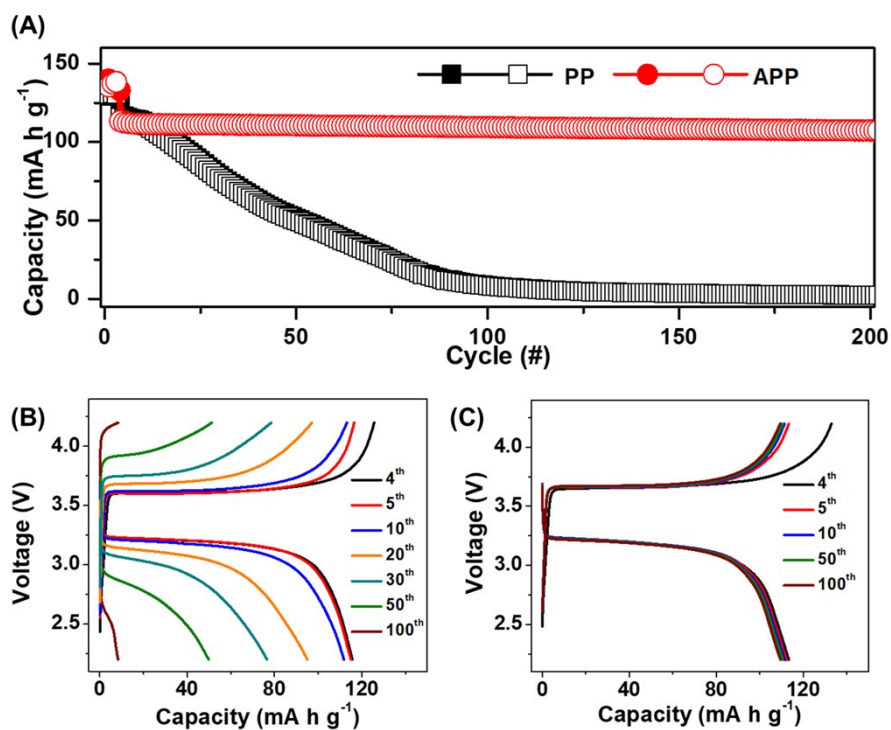

**Fig. S11** LiFePO<sub>4</sub> (LFP) full-cell performance with 1 M LiPF<sub>6</sub> in EC:DMC=1:1 electrolyte. (A) Cycle life, and voltage profile of (B) PP cell and (C) APP cell (4<sup>th</sup>, 5<sup>th</sup>, 10<sup>th</sup>, 20<sup>th</sup>, 30<sup>th</sup>, 50<sup>th</sup>, and 100<sup>th</sup> cycle).

**Table S1** Performance of results in various LMB studies ordered by their experimental details.  
 Note that additives are components for electrolytes in most of other works.

| Modified part | Material used                                  | Cell test                    | Fabrication method                                                                                                                                                                         | Test condition              |                                       | Cycle life of sym. cell (h / cycle) (at rate/capacity cut) | Overpotential (mV) | Electrolyte                                                                                                      |
|---------------|------------------------------------------------|------------------------------|--------------------------------------------------------------------------------------------------------------------------------------------------------------------------------------------|-----------------------------|---------------------------------------|------------------------------------------------------------|--------------------|------------------------------------------------------------------------------------------------------------------|
|               |                                                |                              |                                                                                                                                                                                            | Rate (mA cm <sup>-2</sup> ) | Capacity cut (mA h cm <sup>-2</sup> ) |                                                            |                    |                                                                                                                  |
| Separator     | Na-Alg + PEO                                   | Symmetric                    | Polymer solution (Na-Alg+PEO dissolved in water) was casted on Al dish and then water was evaporated                                                                                       | 0.5 ~ 10                    | 1 ~ 8                                 | 1000 / 500 (at 1 / 1)                                      | < 10               | 1 M LiPF <sub>6</sub> in EC/DMC=1:1                                                                              |
| Electrode     | Sn foil                                        | Symmetric                    | Roll-pressing of Li foil & Sn foil by repetitive calendaring and folding under Ar                                                                                                          | 5 ~ 30                      | 5 ~ 30                                | 400 / 200 (at 5 / 5)                                       | < 10               | 1 M LiPF <sub>6</sub> in EC/PC/DEC=1:1:1 + 10% FEC or 1% VC                                                      |
| Electrode     | C <sub>60</sub> & Mg                           | Symmetric                    | Vacuum thermal evaporation deposition of C <sub>60</sub> and Mg                                                                                                                            | 1 ~ 7                       | 1                                     | 550 / 275 (at 1 / 1)                                       | 50                 | 1 M LiPF <sub>6</sub> in EC/DEC/EMC=1:1:1                                                                        |
| Electrode     | P(SF-DOL)-GO nanosheet                         | Symmetric (electrodeposited) | Li-electrodeposited 3-D Cu was immersed with solution of graphene oxide (GO) and P(SF-DOL) with THF as solvent under Ar                                                                    | 2                           | 4                                     | 320 / 80 (at 2 / 4) (99.1% retention)                      | -                  | 1 M LiPF <sub>6</sub> in EC/EMC/FEC=3:7:1 or EC/DMC + 2% LiBOB                                                   |
| Electrode     | 1,3-dioxolane                                  | Symmetric                    | Li foil was treated with 1,3-dioxolane under Ar                                                                                                                                            | 1                           | 1                                     | 167 / 84 (at 1 / 1)                                        | ~10                | 1 M LiTFSI in TEGDME                                                                                             |
| Electrode     | g-C <sub>3</sub> N <sub>4</sub> coated Ni foam | Symmetric (electrodeposited) | Ni foam was immersed into the solution with exfoliated g-C <sub>3</sub> N <sub>4</sub> by ultrasonication in water and then Li was electrodeposited with amount of 9 mA h cm <sup>-2</sup> | 1 ~ 2                       | 1 ~ 8                                 | 1000 / 500 (at 1 / 1)                                      | 10                 | 1 M LiTFSI in DOL/DME=1:1 + 1% LiNO <sub>3</sub>                                                                 |
| Separator     | Egg shell membrane                             | Half & Symmetric             | Egg shell membrane collected after acetic acid etching was solvothermally-treated with 90% trifluoroethanol solution                                                                       | 1 ~ 10                      | 1 ~ 5                                 | 2000 / 1000 (at 1 / 1)                                     | 12                 | (Hal0) 1 M LiTFSI in DOL/DME=1:1 + 1% LiNO <sub>3</sub> (Sym) 1 M LiPF <sub>6</sub> in EC/DEC/EMC=1:1:1 + 1% FEC |
| Separator     | MOF (HKUST-1) & PVdF-HFP                       | 1-8 Symmetric                | Solution of synthesized HKUST-1 nanoparticles and PVdF-HFP with acetone as solvent was poured on PP separator at vacuum state                                                              | 0.5 ~ 20                    | 0.25 ~ 10                             | 1000 / 1000 (at 10 / 5)                                    | 185                | 1 M LiTFSI in DOL/DME=1:1 + 0.2% LiNO <sub>3</sub>                                                               |
| Separator     | Mesoporous SiO <sub>2</sub> film               | Symmetric                    | Synthesized mesoporous SiO <sub>2</sub> film (GO templated) was coated on commercial PP separator by vacuum filtration                                                                     | 1 ~ 2                       | 1 ~ 2                                 | 230 / 115 (at 1 / 1)                                       | 30                 | 1 M LiTFSI in DOL/DMC=1:1 + 1% LiNO <sub>3</sub>                                                                 |



## Reference

1. M. Wan, S. Kang, L. Wang, H.-W. Lee, G. W. Zheng, Y. Cui and Y. Sun, *Nat. Commun.*, 2020, **11**, 829.
2. Q. Xu, J. Lin, C. Ye, X. Jin, D. Ye, Y. Lu, G. Zhou, Y. Qiu and W. Li, *Adv. Energy Mater.*, 2020, **10**, 1903292.
3. Y. Gao, Z. Yan, J. L. Gray, X. He, D. Wang, T. Chen, Q. Huang, Y. C. Li, H. Wang, S. H. Kim, T. E. Mallouk and D. Wang, *Nat. Mater.*, 2019, **18**, 384-389.
4. X. Zhang, Q. Zhang, X.-G. Wang, C. Wang, Y.-N. Chen, Z. Xie and Z. Zhou, *Angew. Chem. Int. Ed.*, 2018, **57**, 12814-12818.
5. Z. Lu, Q. Liang, B. Wang, Y. Tao, Y. Zhao, W. Lv, D. Liu, C. Zhang, Z. Weng and J. Liang, *Adv. Energy Mater.*, 2019, **9**, 1803186.
6. Z. Ju, J. Nai, Y. Wang, T. Liu, J. Zheng, H. Yuan, O. Sheng, C. Jin, W. Zhang, Z. Jin, H. Tian, Y. Liu and X. Tao, *Nat. Commun.*, 2020, **11**, 488.
7. Y. He, Z. Chang, S. Wu, Y. Qiao, S. Bai, K. Jiang, P. He and H. Zhou, *Adv. Energy Mater.*, 2018, **8**, 1802130.
8. N. Zhang, B. Li, S. Li and S. Yang, *Adv. Energy Mater.*, 2018, **8**, 1703124.
